# Supplementary figures and images for: Analysis of trace amounts of adulterants found in powders/supplements utilizing Raman spectroscopy coupled to direct analyte-probed nanoextraction-nanospray ionization-mass spectrometry
Source: Royal Society of Chemistry journal article supplement (doi:10.1039/c6ay00828c), 2016-01-01

Supplemental Figure 1

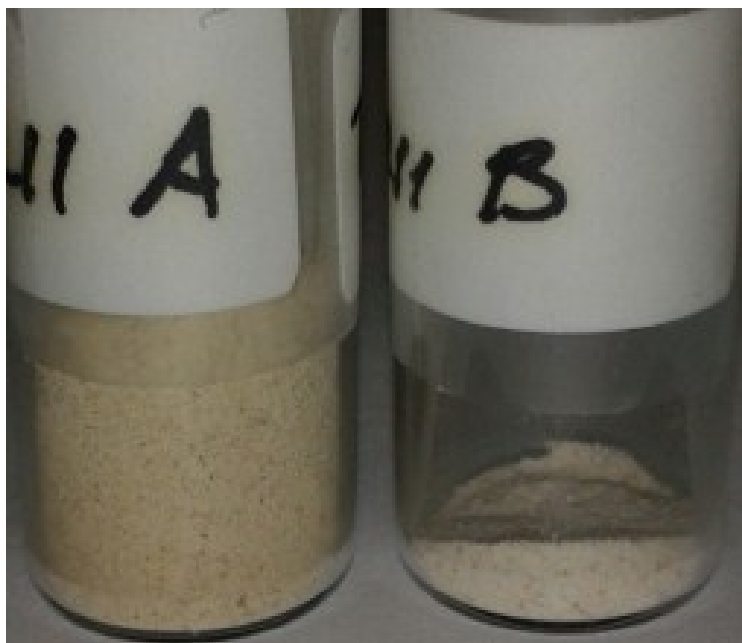

Supplemental Figure 2

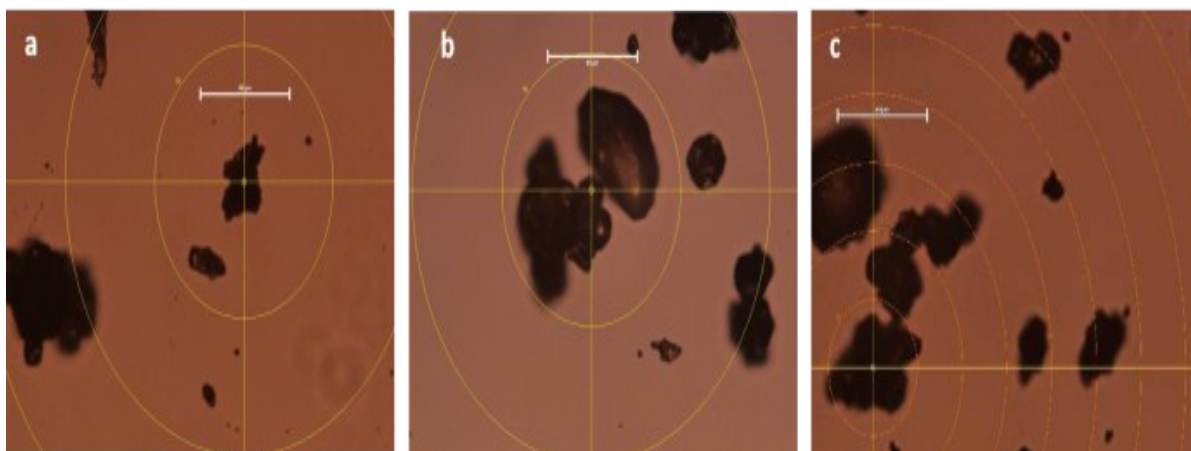

Supplemental Figure 3

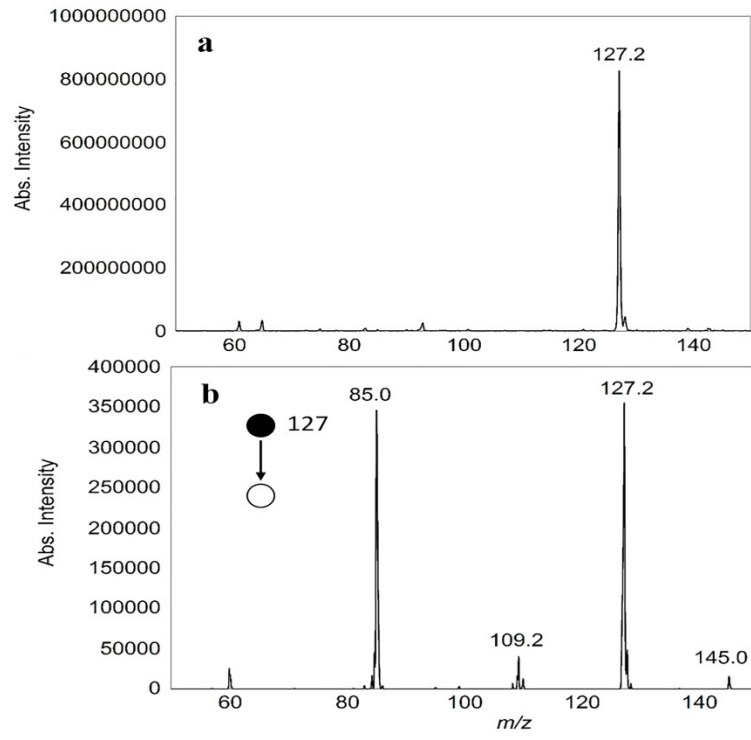

Supplemental Figure 4

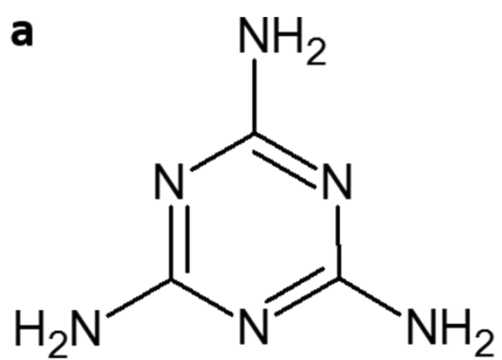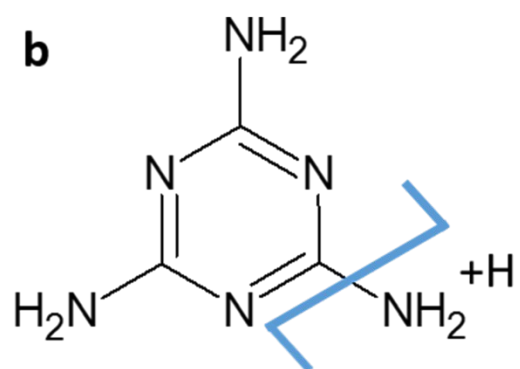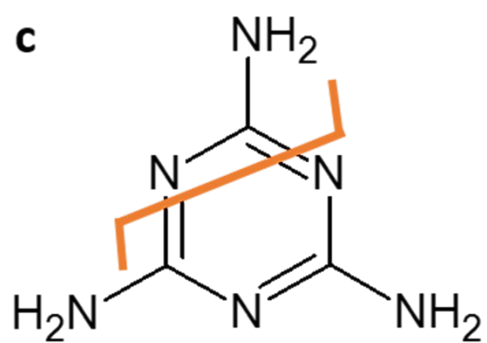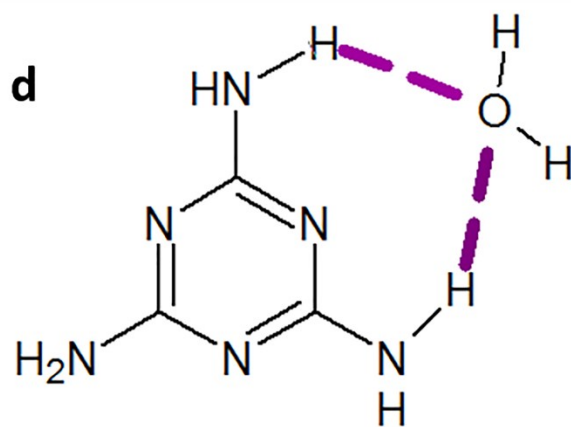

Supplement: c6ay00828c2.pdf [file c6ay00828c2.pdf]
